## CORRESPONDENCE

creased contractility, and vasodilation may worsen the condition. However, sympathetic stimulation associated with painful labor also may have detrimental consequences, and therefore adequate analgesia for the first stage and a controlled second stage of labor is important.<sup>1</sup> By using a small dose of intrathecal fentanyl followed by a dilute epidural infusion, we obtained satisfactory analgesia without adverse hemodynamic changes. We anticipated that any changes that were to occur would be gradual and amenable to early intervention. In this respect, the predictive value of an amyl nitrite provocative test is unknown. In this case, our estimation of the risks of traditional methods of central neuraxial anesthesia prompted us to consider our modified approach.

Anesthesiology  
1998; 88:273

© 1998 American Society of Anesthesiologists, Inc.  
Lippincott-Raven Publishers

**Warwick D. Ngan Kee, F.A.N.Z.C.A.**

**Kwok M. Ho, M.R.C.P.**

Department of Anaesthesia and Intensive Care  
Chinese University of Hong Kong  
Prince of Wales Hospital  
Shatin  
Hong Kong  
warwick@cuhk.edu.hk

## Reference

1. Minnich ME, Quirk JG, Clarke RB: Epidural anesthesia for vaginal delivery in a patient with idiopathic hypertrophic subaortic stenosis. *ANESTHESIOLOGY* 1987; 67:590-2

(Accepted for publication September 4, 1997.)

## Laser Treatment of Endobronchial Lesions

*To the Editor:*—In her interesting article about complications of endobronchial laser treatment, Dullye *et al.* describe three cases of gas embolization. The underlining pathophysiologic mechanism is similar to gas emboli resulting from barotrauma in diving accidents. Because of high pressure, air is forced to enter into the pulmonary vasculature through ruptured lung tissue. Bubbles in the coronary arteries or the central nervous system can be life-threatening or result in prolonged neurologic deficits. Rapid repressurization according to the US-Navy Dive Table 6A can be a life-saving procedure and is described to improve especially the neurologic outcome even if treatment is delayed up to 30 h.<sup>1</sup> Limiting factors for hyperbaric therapy in critical ill patients are the access to an adequately equipped pressure chamber and concomitant diseases like chronic obstructive pulmonary disease, untreated pneumothorax, or severe seizure disorders, which may be exacerbated when oxygen is breathed under pressure.<sup>2</sup> In my opinion, hyperbaric therapy should be considered as a therapeutic option, even if the gas embolus is not the result of a classical diving accident.

Anesthesiology  
1998; 88:273-4

© 1998 American Society of Anesthesiologists, Inc.  
Lippincott-Raven Publishers

*In Reply:*—Dr. Schulz-Stübner brings up an excellent therapeutic option for those patients undergoing laser treatment of endobronchial lesions who suffer a cerebral air embolus. In the three patients we described in our report, only the second patient would fit into this category.<sup>1</sup> The first patient, we believe, suffered a helium gas embolus, delivered from the coaxial gas channel of the laser. We are not aware that there is any evidence that hyperbaric therapy is efficacious in this incidence. The second patient suffered an air and oxygen mixture gas embolus, and certainly hyperbaric therapy should be considered in this situation. The third patient's cerebral gas embolus

**Sebastian Schulz-Stübner, M.D.**

Neurather Str 2f  
Grevenbroich, D-41515  
Germany  
Schust@uic.edu

## References

1. Mader JT, Hulet WH: Delayed hyperbaric treatment of cerebral air embolism: Report of a case. *Arch Neurol* 1979; 36:504
2. Desautels DA: Hyperbaric Medicine in "Critical Care" edited by Civetta JM, Taylor RW and Kirby RR, 2 ed, JB Lippincott, Philadelphia, 1992

(Accepted for publication September 9, 1997.)

was, we believe, 100% oxygen, and this rapidly dissolved without any neurologic deficit. Because many institutions do not have hyperbaric facilities readily available and because these patients often are not in the best physical condition to travel, the use of high concentrations of oxygen, when the risk of combustion is limited, is, perhaps, another alternative technique for avoiding a permanent deficit if a cerebral gas embolus occurs.

However, before hyperbaric therapy can be considered, the appropriate diagnosis needs to be made because the differential diagnosis of cerebral metastatic lesion or cerebral vascular accident may



## CORRESPONDENCE

confuse the clinical picture unless the associated electrocardiographic changes and other evidence of systemic gas embolism are recognized.

**Michael A. E. Ramsay, M.D.**

Department of Anesthesiology and Pain Management  
Baylor University Medical Center  
3500 Gaston Avenue

Anesthesiology

1998; 88:274

© 1998 American Society of Anesthesiologists, Inc.

Lippincott-Raven Publishers

## Analgesic Nephropathy, A Form of Chronic Renal Disease

*To the Editor:*—I read with great interest the case report by Sivara-jan concerning a 38-yr-old who underwent lumbar discectomy and subsequently developed acute tubular necrosis (ANESTHESIOLOGY, 1997; 86:1390-2). The authors imply that preoperative intake of nonsteroidal antiinflammatory drugs (NSAIDs) was the culprit in this otherwise healthy patient's perioperative renal dysfunction.

However, the authors have failed to notice the patients admitted intake of acetaminophencodeine (300 mg-30 mg) tablets every 6 h as another possibility. A form of chronic renal disease called *analgesic nephropathy* can occur in patients who ingest large quantities of acetaminophen and prostaglandin inhibitors. It is believed the minimal requirements for the development of renal damage are 2-3 kg of acetaminophen taken over a 3-yr period.

Pathologically, the acetaminophen injures cells by covalent binding and oxidative damage. The NSAIDs may then potentiate the effect of the acetaminophen by inhibiting the vasodilatory effects of prostaglandin, thus predisposing the papilla to ischemia. Thus, the papillary necrosis may be a result of the combination of the direct toxic effects of acetaminophen and of the ischemic injury to tubular cells and vessels.<sup>1</sup>

Anesthesiology

1998; 88:274-5

© 1998 American Society of Anesthesiologists, Inc.

Lippincott-Raven Publishers

*In Reply:*—We were aware of analgesic nephropathy occurring in patients ingesting large quantities of acetaminophen alone or in combination with NSAIDs. The first reference by Clive and Stoff in our case report has a detailed description of analgesic nephropathy. Analgesic nephropathy is a *chronic* disease that causes tubulointerstitial damage and dysfunction that presents as leukocyturia, hematuria, and inability to concentrate urine.<sup>1</sup> As mentioned in the case report, our patient exhibited none of these, and result of preoperative urinalysis was normal. Our patient suffered acute renal failure, and postoperative urinalysis was characteristic of acute tubular necrosis from

Dallas, Texas 75246

ma.ramsay@baylorltdallas.edu

### Reference

1. Dullye K, et al: Laser treatment of endobronchial lesions. ANESTHESIOLOGY 1997; 86:1387-90

(Accepted for publication September 9, 1997.)

Luckily for this particular patient, after appropriate treatment and cessation of the offending drugs, his blood urea nitrogen and serum creatinine levels returned to normal. However, if his renal failure actually was a result of analgesic nephropathy, it is believed that he is at increased risk for the development of transitional papillary carcinoma of the renal pelvis.<sup>2</sup>

**Joel S. Dunn, M.D.**

Department of Anesthesiology  
Emory University Hospital  
1364 Clifton Road, NE  
Atlanta, Georgia 30322

### References

1. Robbins Pathologic Basis of Disease, 4th ed, Edited by Cotran, Kumar, Robbins, p 1054-5
2. Bergtsson V, et al: Malignancies of the Urinary Tract and Their Relation to Analgesic Abuse. Kidney Int. 13:107 1978

(Accepted for publication September 10, 1997.)

which full recovery took place. Therefore, we did not consider analgesic nephropathy as a possibility.

**Murali Sivarajan, M.B., B.S.**

Department of Anesthesiology (112A)  
V.A. Puget Sound Health Care System  
1660 South Columbian Way  
Seattle, Washington 98108  
murali@u.washington.edu
